# Supplementary material for: Carbon buffered-transition metal oxidenanoparticle–graphene hybrid nanosheets as high-performance anode materials for lithium ion batteries
Source: Royal Society of Chemistry journal article supplement (doi:10.1039/c3ta10986k), 2013-04-12
Supplement: c3ta10986k.pdf [file c3ta10986k.pdf]

## Supporting information

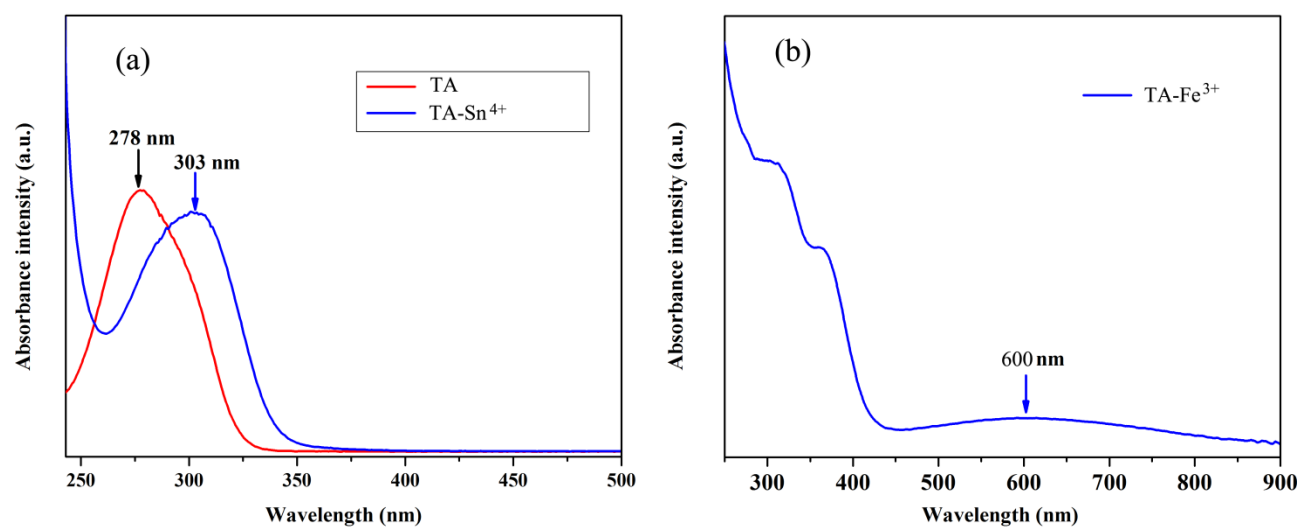

ESI, S1†. UV-visible spectra of TA, TA-Sn<sup>4+</sup> (a) and TA-Fe<sup>3+</sup> (b) in ethanol.

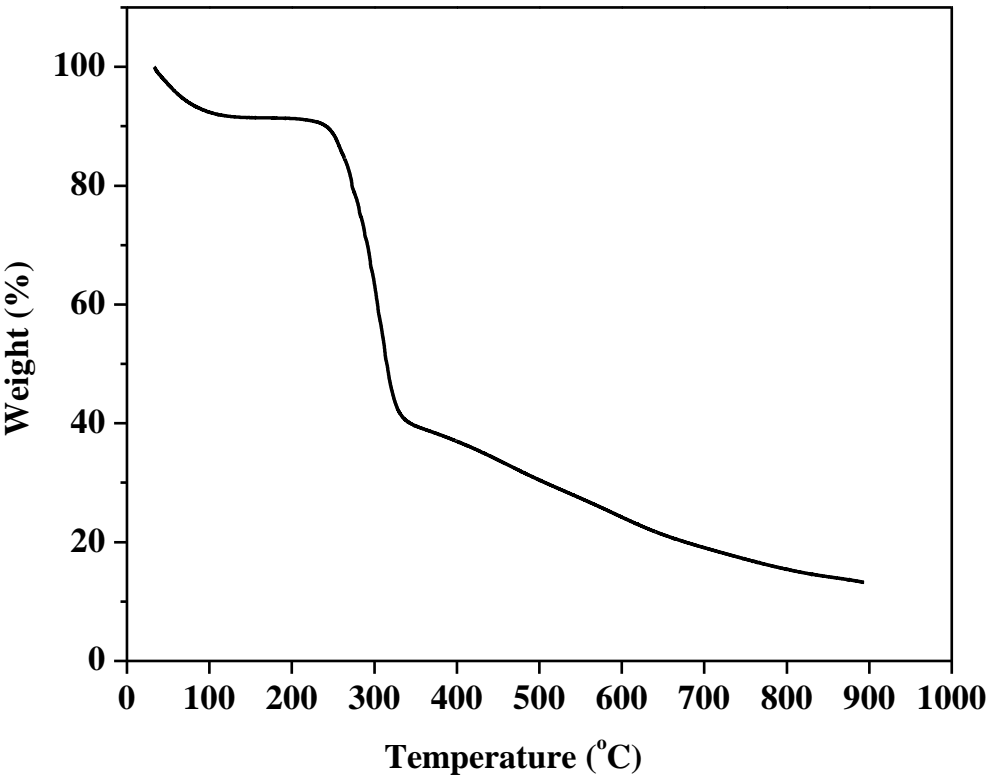

ESI, S2†. TGA spectrum of TA in N<sub>2</sub> flow.

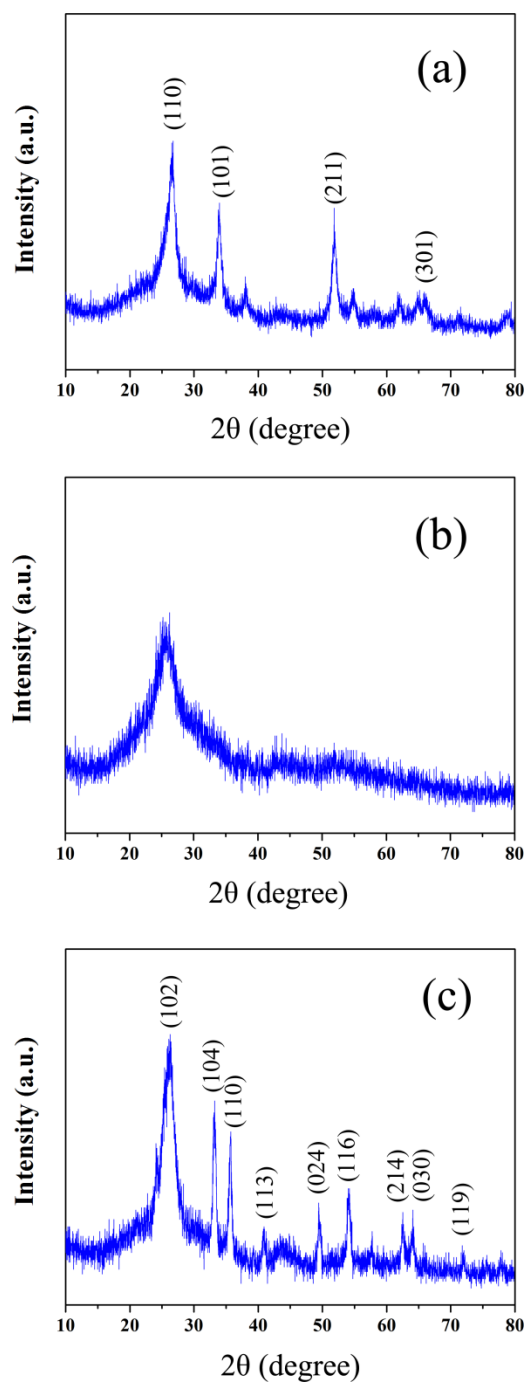

**ESI, S3†.** X-ray diffraction (XRD) patterns of the C-SnO<sub>2</sub>/rGO (a, b) (a: prepared at 500 °C, b: prepared at 400 °C) and the C-Fe<sub>2</sub>O<sub>3</sub>/rGO (c).

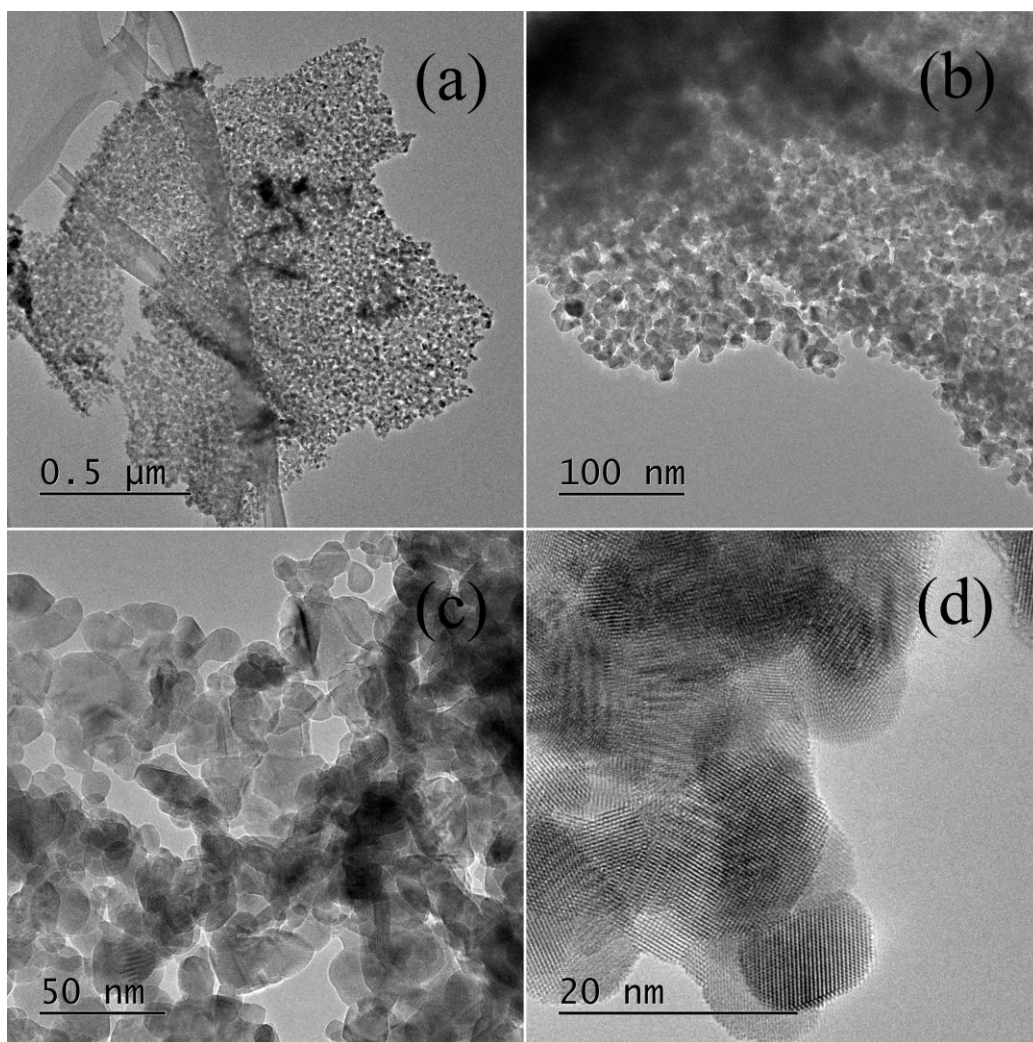

**ESI, S4†.** Transmission electron microscopy (TEM) images of the C-SnO<sub>2</sub>/rGO at 500 °C with different magnifications.

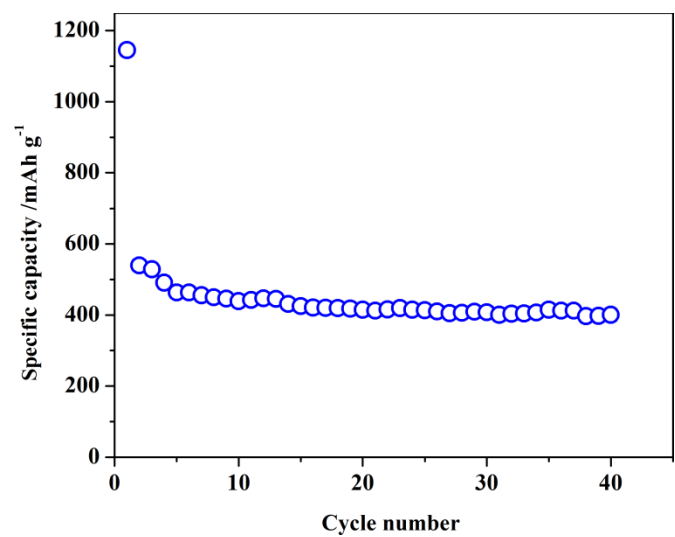

**ESI, S5†.** Discharge profile of the C-SnO<sub>2</sub>/rGO at 400 °C at a current density of 400 mA g<sup>-1</sup> in a voltage window of 0.02-1.5 V.
